# Supplementary material for: Assessment of Diagnosis, Prognosis and Immune Infiltration Response to the Expression of the Ferroptosis-Related Molecule HAMP in Clear Cell Renal Cell Carcinoma
Source: MDPI journal article supplement (doi:10.3390/ijerph20020913), 2023-01-04
Supplement: s1 [file s1]

## Supplementary Material

**Table S1.** (A) Association with overall survival and clinicopathologic characteristic in TCGA patients using Cox regression. (B) Multivariate survival using Cox regression.

| Clinical Characteristics | HR (95% CI)      | <i>p</i> -Value |
|--------------------------|------------------|-----------------|
| A                        |                  |                 |
| Age                      | 1.77 (1.30–2.40) | <0.001          |
| T stage                  | 2.92 (2.10–4.06) | <0.001          |
| N Stage                  | 3.45 (1.83–6.51) | <0.001          |
| M stage                  | 4.39 (3.21–6.00) | <0.001          |
| <i>HAMP</i>              | 1.83 (1.34–2.49) | <0.001          |
| B                        |                  |                 |
| T Stage                  | 1.49 (0.88–2.51) | 0.136           |
| N Stage                  | 2.16 (1.11–4.20) | 0.023           |
| M Stage                  | 3.31 (2.04–5.36) | <0.001          |
| <i>HAMP</i>              | 1.37 (0.86–2.60) | 0.182           |

**Table S2.** The intersection genes selected by GEPIA and R.

| Only GEPIA    | Only R     | GEPIA AND R |
|---------------|------------|-------------|
| ZPLD1         | PTPRN2-AS1 | ZNF385A     |
| ZBED2         | CRYBB1     | VSIG4       |
| TRNP1         | LIMK1      | VAV1        |
| TLR8          | GNA15      | UCP2        |
| ST3GAL5       | BASP1      | TYROBP      |
| SNORA70       | PYCARD     | TREM2       |
| SIGLEC10      | JPT1       | TNFSF13B    |
| SELPLG        | AC011899.2 | TNFAIP8L2   |
| SCIMP         | HTRA4      | STAC3       |
| SAMSN1        | LINC02513  | SPI1        |
| RP4-736H5.3   | IGFLR1     | SNX20       |
| RP11-9M16.3   | TRPM2      | SLAMF8      |
| RP11-83C7.1   | LY96       | SIGLEC9     |
| RP11-742B18.1 | PLA2G2D    | RNASE2      |
| RP11-556E13.1 | CSTA       | RGS10       |
| RP11-153M7.1  | RARRES1    | RAC2        |
| RP1-111D6.3   | APOC1      | PCED1B-AS1  |
| RNASE3        | BATF       | OSCAR       |
| PTPRO         | NCF4       | MARCO       |
| PLEK          | PLTP       | LILRB4      |
| PLB1          | CD72       | LAT2        |
| NRSN1         | CARD11     | LAPTM5      |
| MCEMP1        | LINC01857  | LAIR1       |
| LINC01111     | C1R        | IKBKE       |
| LINC01109     | DOK3       | GPR84       |
| LINC01094     | PLAUR      | GAL3ST4     |
| LHFPL2        | LY86       | FCGR2B      |
| LGALS9        | WAS        | FCGR1B      |
| ITGB2         | FERMT3     | FCGR1A      |
| IL2RA         | CEBPA      | FCER1G      |
| IL21R         | SH3BP1     | ERC2        |
| IGF2BP3       | FCGR1CP    | CD14        |

|            |            |            |
|------------|------------|------------|
| HGF        | APOC2      | C1QC       |
| HCK        | POU2F2     | C1QB       |
| FPR1       | DNAJC5B    | C1QA       |
| FCGR3A     | CTSZ       | BCL2A1     |
| FCGR1C     | MILR1      | ARPC1B     |
| EBI3       | KCNN4      | AIF1       |
| DLEU7      | APOE       | AC092484.1 |
| DCBLD2     | CD37       |            |
| CYBB       | FZD2       |            |
| CSF1R      | MOCOS      |            |
| CRB2       | NOD2       |            |
| CR1        | HCST       |            |
| CLEC6A     | TMEM150B   |            |
| CD86       | SLC29A3    |            |
| CD80       | C1S        |            |
| CD53       | REEP4      |            |
| CD4        | SAA1       |            |
| CD163      | LPAR5      |            |
| CCR1       | PI3        |            |
| CASP5      | GPX1       |            |
| C3AR1      | RGS19      |            |
| ATP5G2P4   | NCF1       |            |
| ARL4C      | S100A11    |            |
| ALOX5AP    | GFPT2      |            |
| ADORA3     | FTL        |            |
| ADGRE1     | FCHO1      |            |
| ADAMDEC1   | AC093895.1 |            |
| AC023590.1 | ADAM8      |            |
| AC011899.9 | NCF1C      |            |

**Table S3.** Gene sets enriched in *HAMP* high expression phenotype.

| Gene Set Name                                    | NES      | NOM p-val | FDR q-val              |
|--------------------------------------------------|----------|-----------|------------------------|
| KEGG_OXIDATIVE_PHOSPHORYLATION                   | 2.086371 | 0         | 0.031508               |
| KEGG_PARKINSONS_DISEASE                          | 2.00546  | 0.019493  | 0.045734               |
| GO_CYTOKINE_ACTIVITY                             | 2.535268 | 0         | $3.66 \times 10^{-04}$ |
| GO_IMMUNE_RECEPTOR_ACTIVITY                      | 2.439605 | 0         | $7.67 \times 10^{-04}$ |
| GO_T_CELL_PROLIFERATION                          | 2.330577 | 0         | $3.76 \times 10^{-05}$ |
| GO_T_CELL_ACTIVATION_INVOLVED_IN_IMMUNE_RESPONSE | 2.258216 | 0         | $1.87 \times 10^{-04}$ |

**Table S4.** Gene sets enriched in *HAMP* low expression phenotype.

| Gene Set Name                          | NES      | NOM p-val | FDR q-val              |
|----------------------------------------|----------|-----------|------------------------|
| KEGG_B_CELL_RECEPTOR_SIGNALING_PATHWAY | -2.02156 | 0.003984  | 0.010226               |
| KEGG_JAK_STAT_SIGNALING_PATHWAY        | -2.2941  | 0         | $9.30 \times 10^{-04}$ |
| KEGG_SMALL_CELL_LUNG_CANCER            | -1.78866 | 0.023857  | 0.046139               |
| KEGG_PANCREATIC_CANCER                 | -1.88035 | 0.01232   | 0.027684               |
| KEGG_AUTOIMMUNE_THYROID_DISEASE        | -1.92458 | 0.01378   | 0.020369               |
| KEGG_NON_SMALL_CELL_LUNG_CANCER        | -2.02375 | 0.002033  | 0.010281               |
| GO_AMMONIUM_ION_METABOLIC_PROCESS      | -2.50828 | 0         | 0.006186               |
| GO_BETA_CATENIN_BINDING                | -2.3993  | 0         | 0.027118               |
